# Supplementary material for: Machine-Learning Based Analysis of Liquid Water Path Adjustments to Aerosol Perturbations in Marine Boundary Layer Clouds Using Satellite Observations
Source: MDPI journal article supplement (doi:10.3390/atmos13040586), 2022-04-05
Supplement: s1 [file s1]

Archive with 1 entries (1 files):
- atmosphere-1624129-supplementary.pdf
